# Supplementary material
Source: HighWire-hosted journal article supplement (https://erj.ersjournals.com/content/57/4/2004500)
Supplement: inline-supplementary-material-1 [file inline-supplementary-material-1.pdf]

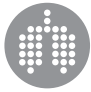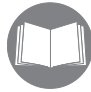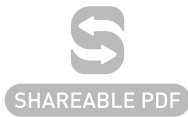

# MAV(S)erick mitochondria: an unconventional role for mitochondrial antiviral signalling protein in pulmonary fibrosis

Ram P. Naikawadi and Paul J. Wolters

**Affiliation:** Division of Pulmonary, Critical Care, Allergy and Sleep Medicine, Dept of Medicine, University of California, San Francisco, CA, USA.

**Correspondence:** Paul J. Wolters, University of California, San Francisco, Box 0111, San Francisco, CA 94143-0111, USA. E-mail: paul.wolters@ucsf.edu

 @ERSpublications  
**Mitochondrial antiviral signalling protein (MAVS) mediates pulmonary fibrosis by regulating cGAS-STING and senescence programming** <https://bit.ly/35Tijjj>

**Cite this article as:** Naikawadi RP, Wolters PJ. MAV(S)erick mitochondria: an unconventional role for mitochondrial antiviral signalling protein in pulmonary fibrosis. *Eur Respir J* 2021; 57: 2004500 [<https://doi.org/10.1183/13993003.04500-2020>].

This single-page version can be shared freely online.

Idiopathic pulmonary fibrosis (IPF) is a chronic, progressive, age-related interstitial lung disease. Incidence of IPF in the USA ranges between 14 and 63 per 100 000 people [1]. The average survival rate from the time of diagnosis is 3–5 years. IPF is associated with several genetic and environmental factors. Genes associated with a risk for developing IPF generally fall into two categories: epithelial cell genes (*e.g. MUC5B, DSP, SFTPA2, ABCA3*) or genes involved in telomere maintenance (*e.g. TERT, TERC, RTEL1*) [2, 3]. Environmental factors such as smoking, air pollution [4, 5] or accumulation of chitin polysaccharides [6] may also promote lung fibrosis. Consistent with the association of genes of the epithelium and telomere maintenance to IPF, short telomeres are a common finding in epithelial cells of IPF patients. An animal model of telomere dysfunction mediated by genetic deletion of TRF1 caused fibrosis that was progressive and chronic [7] indicating that telomere dysfunction is a molecular driver of fibrosis.
